# Supplementary material for: Evaluating uncertainty in aerosol forcing of tropical precipitation shifts
Source: Copernicus journal article supplement (doi:10.5194/esd-13-1215-2022), 2022-08-26
Supplement: Supplementary file 1 [file esd-13-1215-2022-supplement.pdf]

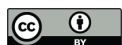

*Supplement of*

## **Evaluating uncertainty in aerosol forcing of tropical precipitation shifts**

**Amy H. Peace et al.**

*Correspondence to:* Amy H. Peace ([a.h.peace@exeter.ac.uk](mailto:a.h.peace@exeter.ac.uk))

The copyright of individual parts of the supplement might differ from the article licence.

**Table S1:** This table summarises the parameters perturbed in the HadGEM3-GC3.05 PPE used in this study. 47 independent and 5 dependent model parameters were perturbed across the physical atmosphere, aerosol and land surface schemes. The model schemes are shown in light grey at the beginning of each section. The name and a brief description of each perturbed parameter are shown. The process for parameter selection and more detail on the distribution and effect of each parameter is found in Sexton et al. 2021.

| Perturbed parameter         | Name                                                                           | Description                                                                                                                                           |
|-----------------------------|--------------------------------------------------------------------------------|-------------------------------------------------------------------------------------------------------------------------------------------------------|
| Convection                  |                                                                                |                                                                                                                                                       |
| ent_fac_dp                  | Deep entrainment amplitude                                                     | Controls the shape of the mass flux and sensitivity of deep convection to relative humidity to deep entrainment.                                      |
| ent_fac_md                  | Mid entrainment amplitude                                                      | Controls the shape of the mass flux and the sensitivity of mid-level convection to relative humidity to mid-level entrainment.                        |
| amdet_fac                   | Mixing detrainment                                                             | Controls the rate of humidification of the atmosphere and the shape of the convective heating profile.                                                |
| r_det                       | Coefficient for adaptive detrainment                                           | Decrease of mass flux with height under decreasing parcel buoyancy.                                                                                   |
| cca_md_knob,<br>cca_dp_knob | Convective core radiative effects                                              | Controls how much deep and mid-level convective core gets seen by radiation.                                                                          |
| cca_sh_knob                 | Shallow convection core radiative effects                                      | Controls how much shallow convection gets seen by radiation.                                                                                          |
| mparwtr                     | Maximum condensate                                                             | The maximum condensate a convective parcel can hold before it is converted to precipitation.                                                          |
| qlmin                       | Minimum critical cloud condensate                                              | The minimum value of the function that defines the maximum amount of condensate a convective parcel can hold before it is converted to precipitation. |
| Gravity wave drag           |                                                                                |                                                                                                                                                       |
| gwd_frc                     | Critical Froude number                                                         | Determines the cut-off mountain height and the depth of the blocked flow layer around sub-grid mountains.                                             |
| fbcd                        | Flow blocking drag coefficient                                                 | Determines the size of the low-level drag associated with flow blocking effects by subgrid mountains.                                                 |
| gwd_fsat                    | Inverse critical Froude number for wave saturation                             | Determines the amplitude at which mountain waves generated by sub-grid orography will break, and exert a drag on the flow.                            |
| gsharp                      | Mountain wave amplitude                                                        | Determines the amplitude of the mountain waves generated by sub-grid orography.                                                                       |
| orog_drag_param             | Drag coefficient for turbulent form drag                                       | Determines the size of the form drag exerted on flow by small-scale sub-grid hills.                                                                   |
| nsigma                      | Scaling factor applied to the standard deviation of sub-grid mountain heights. | Determines the local assumed sub-grid orography height which is used in the gravity wave drag scheme.                                                 |
| Boundary layer              |                                                                                |                                                                                                                                                       |
| g0                          | Flux profile parameter                                                         | Used in the definition of stability functions.                                                                                                        |
| ricrit = 10.0 / g0          | Critical Richardson number                                                     | Value of Richardson number below which air becomes dynamically unstable and turbulent.                                                                |
| a_ent_1                     | Cloud-top entrainment rate.                                                    | Used in entrainment rate calculation.                                                                                                                 |
| g1                          | Cloud-top diffusion                                                            | Used in cloud-top diffusion calculation.                                                                                                              |

|                 |                                             |                                                                                                                |
|-----------------|---------------------------------------------|----------------------------------------------------------------------------------------------------------------|
| zhloc_depth_fac | Threshold fraction of the cloud layer depth | Fractional height into cloud layer for which Ri-based boundary layer depth can diagnose shear dominated layer. |
| par_mexcla      | Neutral mixing length                       | Mixing length for fluid parcels under neutral stability conditions.                                            |
| lambda_min      | Minimum value of mixing length.             |                                                                                                                |

  

|                                        |                                                                                                          |                                                                                                                                                                          |
|----------------------------------------|----------------------------------------------------------------------------------------------------------|--------------------------------------------------------------------------------------------------------------------------------------------------------------------------|
| dec_thresh_cld,<br>dec_thresh_cloud2cu | Decoupling threshold for cloud boundary layers                                                           |                                                                                                                                                                          |
| forced_cub_fac                         | Mixing factor applied to the in-cloud water content of forced cumulus clouds                             | Determines the fraction of diagnosed adiabatic water content of forced cumulus clouds which is allowed to remain.                                                        |
| Clouds and cloud radiation             |                                                                                                          |                                                                                                                                                                          |
| dbstdtbs_turb_0                        | Cloud erosion rate                                                                                       | Determines the rate which un-resolved sub-grid motions mix clear and cloudy air.                                                                                         |
| two_d_fsd_factor                       | Scaling to make sub-grid cloud condensate variance to cloud cover and convective activity to dimensional | Makes the cloud water variability around the grid box average a two dimensional relationship, based on 1-d empirical relationship.                                       |
| dp_corr_strat                          | Decorrelation scale pressure                                                                             | Determines the vertical overlap between clouds in the sub-column in the cloud generator used to calculate the radiative impact of clouds.                                |
| ice_width                              | Ice width                                                                                                | Determines the amount of ice water content that corresponds to a factor of two reduction in the width of the vapour distribution in the liquidfree part of the grid box. |
| Cloud microphysics                     |                                                                                                          |                                                                                                                                                                          |
| c_r_correl                             | Cloud-rain correlation coefficient                                                                       | Determines the sub-grid correlation between cloud and precipitation.                                                                                                     |
| m_ci                                   | Ice fall speed                                                                                           | Scaling factor for the ice fall speed.                                                                                                                                   |
| ai                                     | Precursor coefficient in the mass-diameter relationship for ice                                          | Changing ai has the effect of changing the density of ice.                                                                                                               |
| xlr                                    |                                                                                                          | Controls the shape of the particle size distribution for raindrops.                                                                                                      |
| ar                                     | Aspect ratio of ice particles                                                                            | Used to calculate the depositional capacitance of ice crystals which affects how efficiently they grow by depleting water vapour.                                        |
| mp_dz_scal                             | Vertical scale in mixedphase turbulent production of supercooled liquid water                            | Vertical length scale over which the turbulence acts to produce supercooled water.                                                                                       |
| Aerosols                               |                                                                                                          |                                                                                                                                                                          |
| ps_anth_so2_emiss                      | Anthropogenic SO <sub>2</sub> emission flux                                                              | Direct scaling of anthropogenic SO <sub>2</sub> emission flux.                                                                                                           |
| ps_dry_so2_veloc                       | Dry deposition rate of SO <sub>2</sub>                                                                   | Scaling factor for the dry deposition rate which removes SO <sub>2</sub> from lowest levels through deposition according to land surface type and prevailing wind speed. |

|                       |                                                                                               |                                                                                                                                                                                                                |
|-----------------------|-----------------------------------------------------------------------------------------------|----------------------------------------------------------------------------------------------------------------------------------------------------------------------------------------------------------------|
| ps_sigma_updraught    | Scaling of the standard deviation use to define the pdf of updraught velocity                 | Relates the activation of aerosols to cloud droplets to the standard deviation used to define the pdf of updraught velocity.                                                                                   |
| biom_aer_ems_scaling  | Scaling of emission flux from biomass burning                                                 | Direct scaling of emission flux.                                                                                                                                                                               |
| ps_natl_ss_emiss      | Scaling of emission flux from sea spray                                                       | Direct scaling of emissions flux.                                                                                                                                                                              |
| ps_natl_dms_emiss     | Dimethyl-sulphide emission flux                                                               | Direct scaling of emissions flux.                                                                                                                                                                              |
| ps_acc_cor_scav       | Scavenging rate in the coarse and accumulation modes.                                         | Scaling of the scavenging rate calculated in the model.                                                                                                                                                        |
| ps_cloud-pH           | pH of cloud drops                                                                             | Controls the in-cloud SO <sub>4</sub> production dependent on SO <sub>2</sub> availability.                                                                                                                    |
| Land surface and snow |                                                                                               |                                                                                                                                                                                                                |
| u10_max_coare         | Maximum wind speed used in the Coupled Ocean-Atmosphere Response Experiment (COARE) algorithm | This is the highest wind speed used in calculating the Charnock coefficient in the COARE algorithm.                                                                                                            |
| r0                    | Grain size of fresh snow                                                                      | The grain size of fresh snow is set to this value.                                                                                                                                                             |
| rho_snow_fresh        | Fresh snow density                                                                            | The density of fresh snow.                                                                                                                                                                                     |
| tupp_io               | Upper value about 4K above the optimal value for photosynthesis                               | Temperatures above the optimal value for photosynthesis will drive a decline in photosynthesis.                                                                                                                |
| f0_io                 | Maximum ratio of internal to external CO <sub>2</sub>                                         | Controls the gradient of CO <sub>2</sub> between plant stomata and the ambient air.                                                                                                                            |
| dz0v_dh_io            | Rate of change of vegetation roughness length for momentum with height                        | Controls surface roughness which affects the surface exchange of momentum and therefore heat, water and trace gases.                                                                                           |
| nl0-io                | Top leaf nitrogen concentration                                                               | Defines the top leaf ration of nitrogen to carbon. Plant photosynthesis is defined in the model to be proportional to the leaf nitrogen concentration.                                                         |
| rootd_ft_io           | Root depth                                                                                    | Controls the depth to which soil moisture is available.                                                                                                                                                        |
| psm                   | Scaling factor for critical and saturation levels for soil moisture towards wilt level        | This pair of parameters control the critical and saturated volumetric soil moisture thresholds. The critical threshold controls the level above which evapotranspiration is no longer soil moisture dependent. |

**Figure S1: 1860 to 1975 aerosol ERF for individual ensemble members. Global mean aerosol ERF, and northern hemisphere (0 to 60 °N) – southern hemisphere (0 to 60 °S) are shown above each ensemble member. The ensemble mean and standard deviation are shown in the first two plots.**

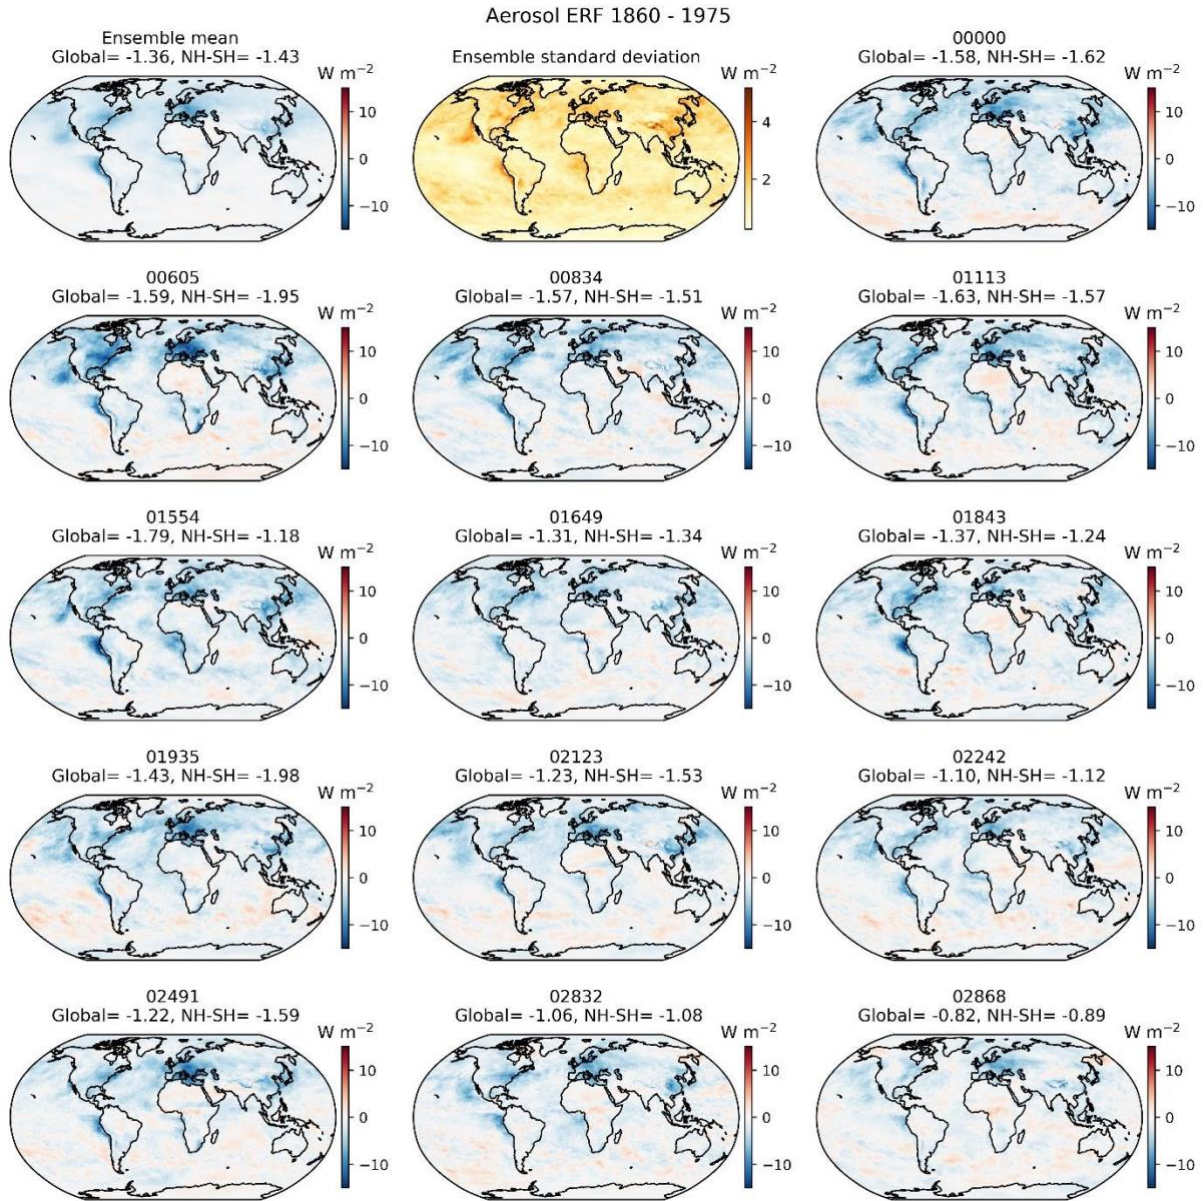



**Figure S2: 1860 to 2005 aerosol ERF for individual ensemble members. Global mean aerosol ERF, and northern hemisphere (0 to 60 °N) – southern hemisphere (0 to 60 °S) are shown above each ensemble member. The ensemble mean and standard deviation are shown in the first two plots.**

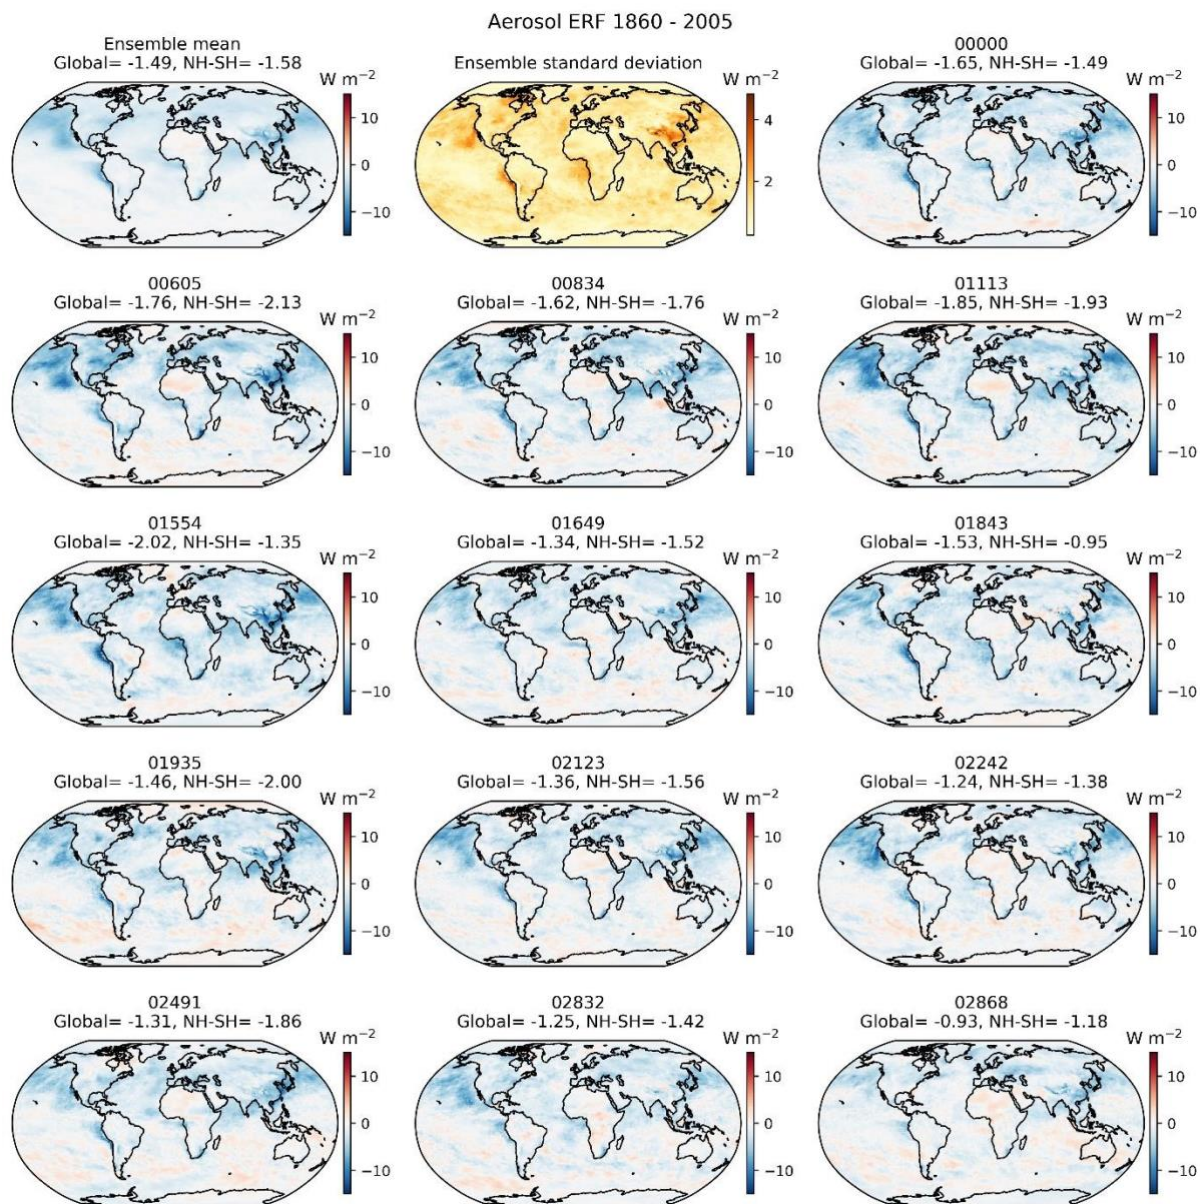

**Figure S3: Time series of  $\phi_{ITCZ}$  anomaly against a 1950 to 2000 reference period with no rolling mean for global (top, 0 - 360 ° longitude), Atlantic (middle, -70 - 10 ° longitude) and Pacific regional means (150 - 285 ° longitude). Major volcanic eruptions are marked with grey vertical lines. The ensemble mean is shown by the darker line, and the individual ensemble members in the lighter lines.**

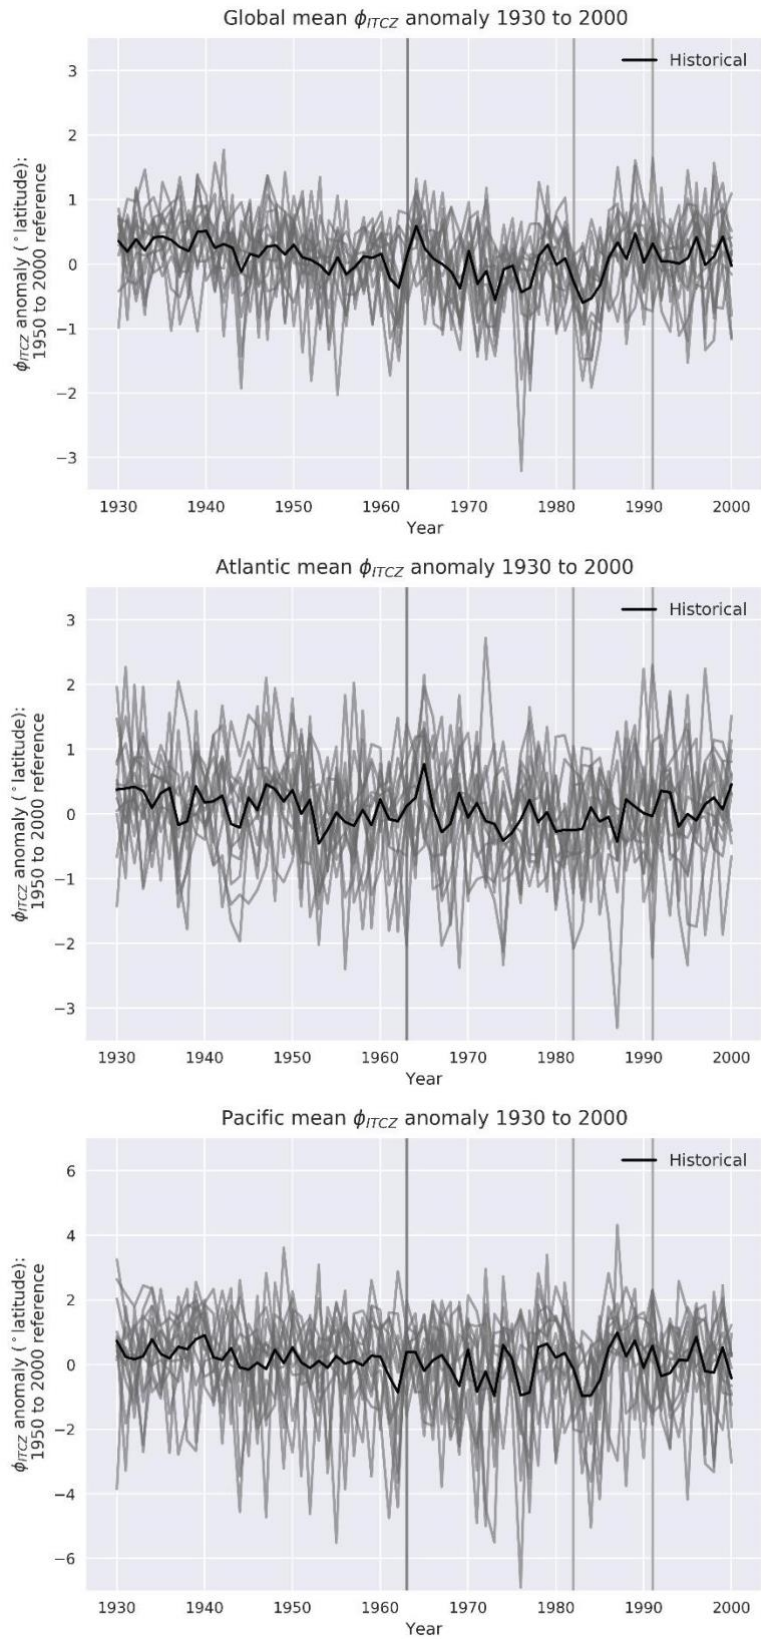

**Text S1.** Tropical precipitation shifts were also calculated based on the methodology in Allen et al. 2015 in order to compare the spread in our single-model PPE to a multi-model ensemble. First, the annual precipitation anomaly is calculated against a 1961 – 1990 base period. This methodology then defines tropical precipitation shifts ( $\text{mm decade}^{-1}$ ) as the difference between area-weighted northern hemisphere ( $0 - 20^\circ\text{N}$ ) and southern hemispheric ( $0 - 20^\circ\text{S}$ ) regional means over land and ocean. The Atlantic region is defined ( $75^\circ\text{W} - 30^\circ\text{E}$ ) and the Pacific region as ( $30^\circ\text{E} - 75^\circ\text{W}$ ). The trend over 1950 – 1985 is calculated from the 5-year rolling mean of this metric.

**Figure S4.** The 1950 to 1985 trend in the tropical precipitation metric (NH-SH PRECT /  $\text{mm decade}^{-1}$ ) defined in Text S1 over land and ocean for the three regional means.

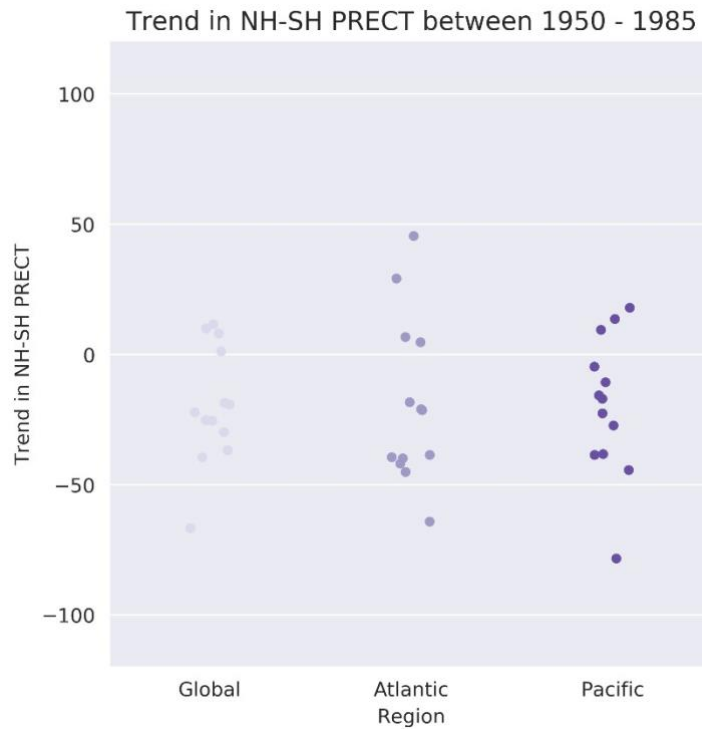



**Figure S5: Scatter plot of trend in 5-year rolling mean  $\Phi_{ITCZ}$  in 1950 to 1985 (top) against ocean-only interhemispheric (60 °S to 60 °N) trend in surface air temperature (top), total implied radiative forcing (middle) and 1860 to 1975 aerosol ERF (bottom) for global (left), Atlantic (middle) and Pacific (right) regional means. Individual ensemble members are coloured according to legend. Spearman's rank correlation coefficient is shown at top left of each plot.**

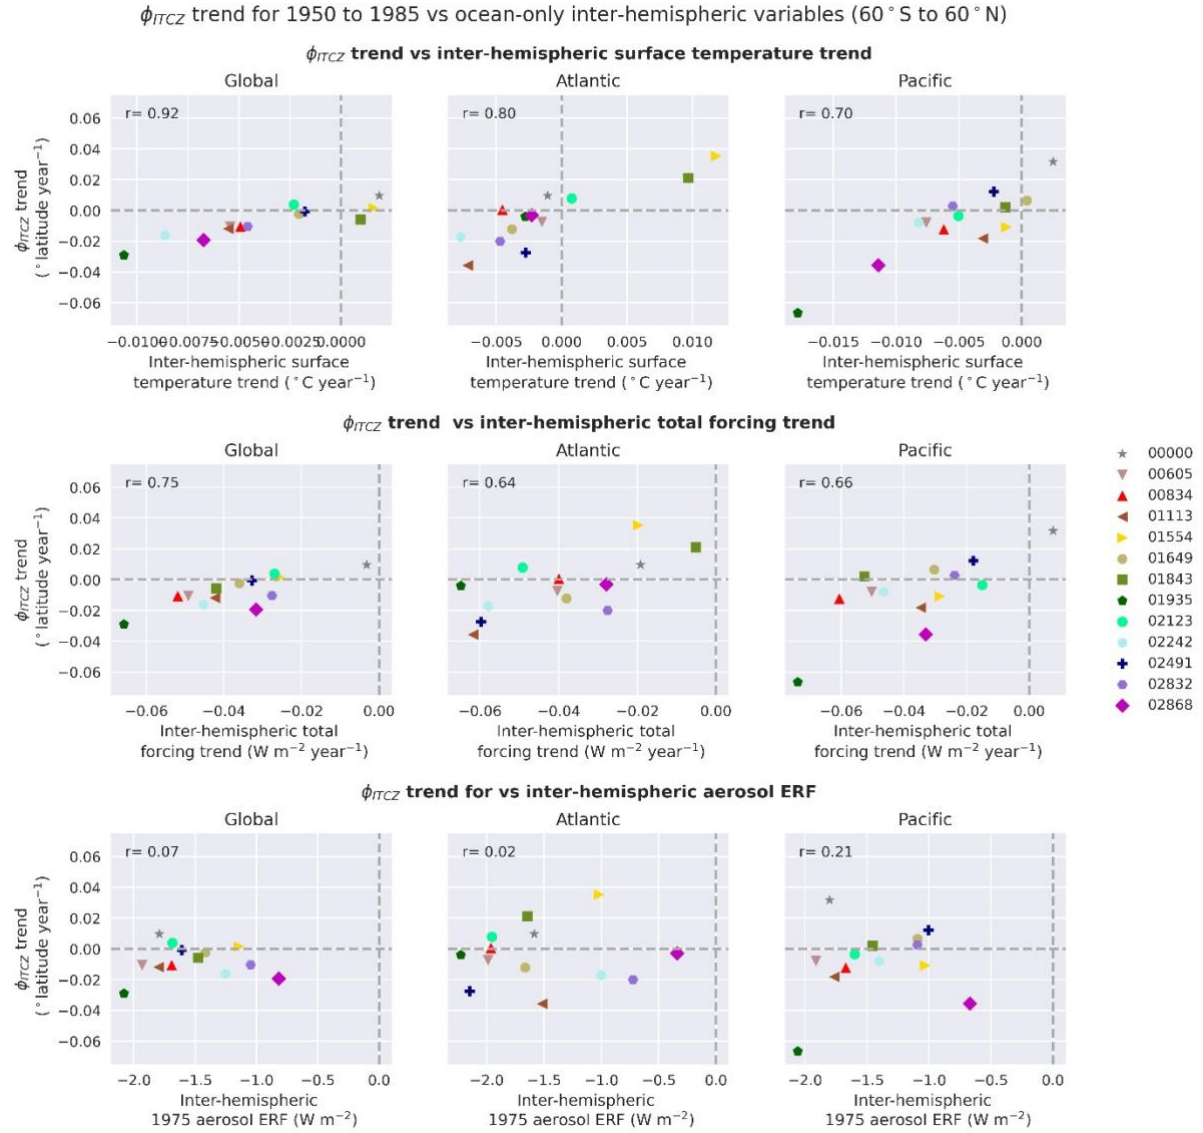

**Table S2. Table of Spearman's rank correlation coefficients for the trend in global mean 5-year rolling mean  $\Phi_{ITCZ}$  and ocean-only inter-hemispheric variables shown in Figure 3 for the time periods: 1950 to 1985, 1950 to 1980, 1940 to 1985, 1940 to 1980 and 1940 to 1975.**

| Time period          | Correlation with the trend in interhemispheric surface air temperature ( $^{\circ}\text{C year}^{-1}$ ) | Correlation with the trend in interhemispheric implied total forcing ( $\text{W m}^{-2} \text{ year}^{-1}$ ) | Inter-hemispheric 1860 to 1975 aerosol ERF ( $\text{W m}^{-2}$ ) |
|----------------------|---------------------------------------------------------------------------------------------------------|--------------------------------------------------------------------------------------------------------------|------------------------------------------------------------------|
| 1950 to 1985 (shown) | $r = 0.92$                                                                                              | $r = 0.75$                                                                                                   | $r = 0.07$                                                       |
| 1950 to 1980         | $r = 0.69$                                                                                              | $r = 0.66$                                                                                                   | $r = 0.14$                                                       |
| 1940 to 1985         | $r = 0.19$                                                                                              | $r = 0.55$                                                                                                   | $r = -0.08$                                                      |
| 1940 to 1980         | $r = -0.03$                                                                                             | $r = 0.49$                                                                                                   | $r = -0.10$                                                      |
| 1940 to 1975         | $r = 0.26$                                                                                              | $r = 0.63$                                                                                                   | $r = -0.35$                                                      |

**Figure S6: Time series of the inter-hemispheric (60 °S to 60 °N, NH-SH) surface temperature anomaly against a 1950 to 2000 reference period with a 5-year rolling mean for global (top, 0 - 360 ° longitude), Atlantic (middle, -70 - 10 ° longitude) and Pacific regional means (150 - 285 ° longitude). Historical emissions are shown in black, RCP8.5 in red and RCP2.6 in blue. Major volcanic eruptions are marked with grey vertical lines. The ensemble mean is shown by the darker line, and the individual ensemble members in the lighter lines.**

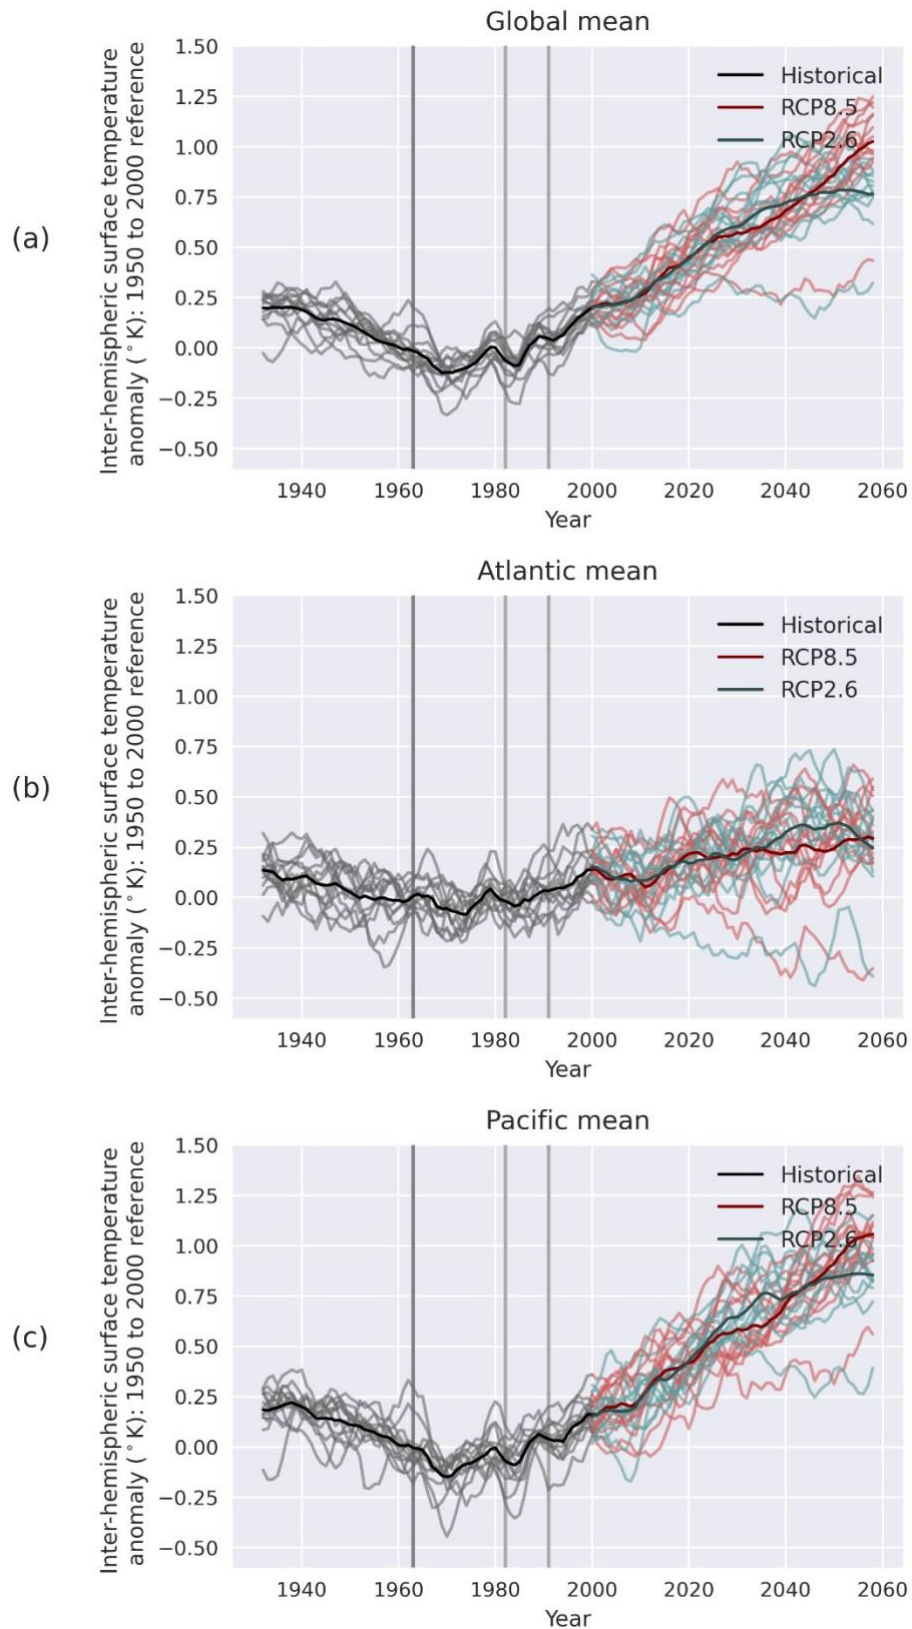

**Figure S7: Time series of the inter-hemispheric (60 °S to 60 °N, NH-SH) total AOD anomaly against a 1950 to 2000 reference period with a 5-year rolling mean for global (top, 0 - 360 ° longitude), Atlantic (middle, -70 - 10 ° longitude) and Pacific regional means (150 - 285 ° longitude). Historical emissions are shown in black and RCP8.5 in red. Major volcanic eruptions are marked with grey vertical lines. The ensemble mean is shown by the darker line, and the individual ensemble members in the lighter lines.**

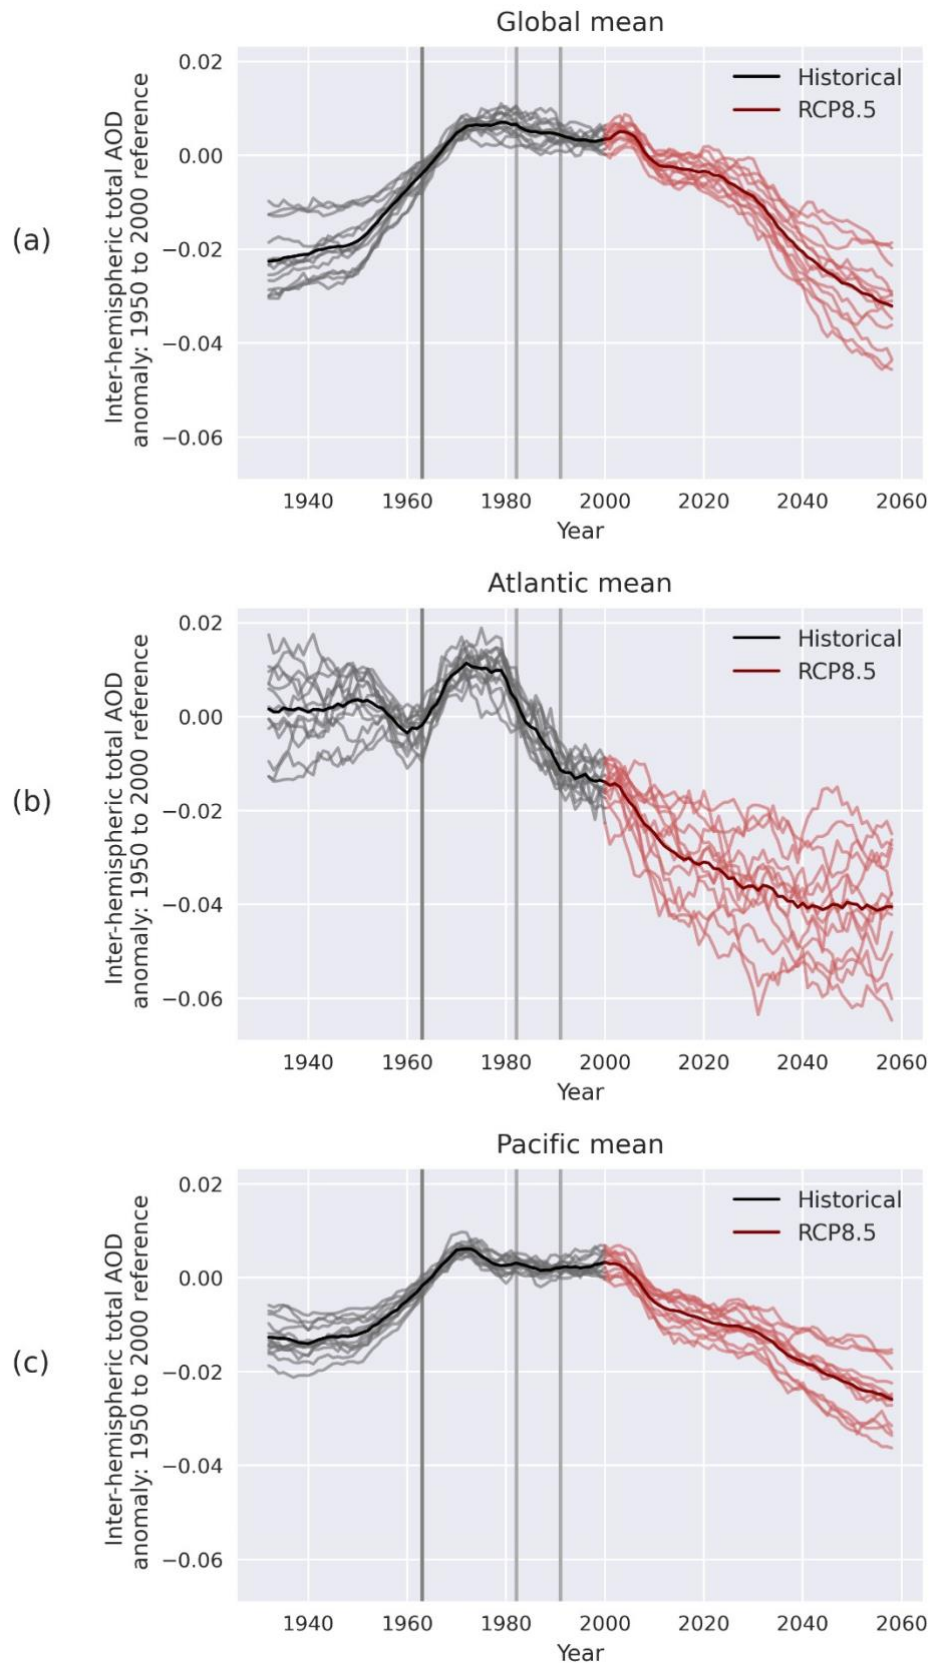

**Figure S8: Scatter plot of (top) 1950 to 1985 inter-hemispheric surface temperature trend against 1860 to 1975 aerosol ERF and (middle, bottom) 2006 to 2060 inter-hemispheric surface temperature trend against 1860 to 2005 aerosol ERF for global (left), Atlantic (middle) and Pacific (right) regional means. Individual ensemble members are coloured according to legend. Spearman's correlation coefficient is shown at top left of each plot.**

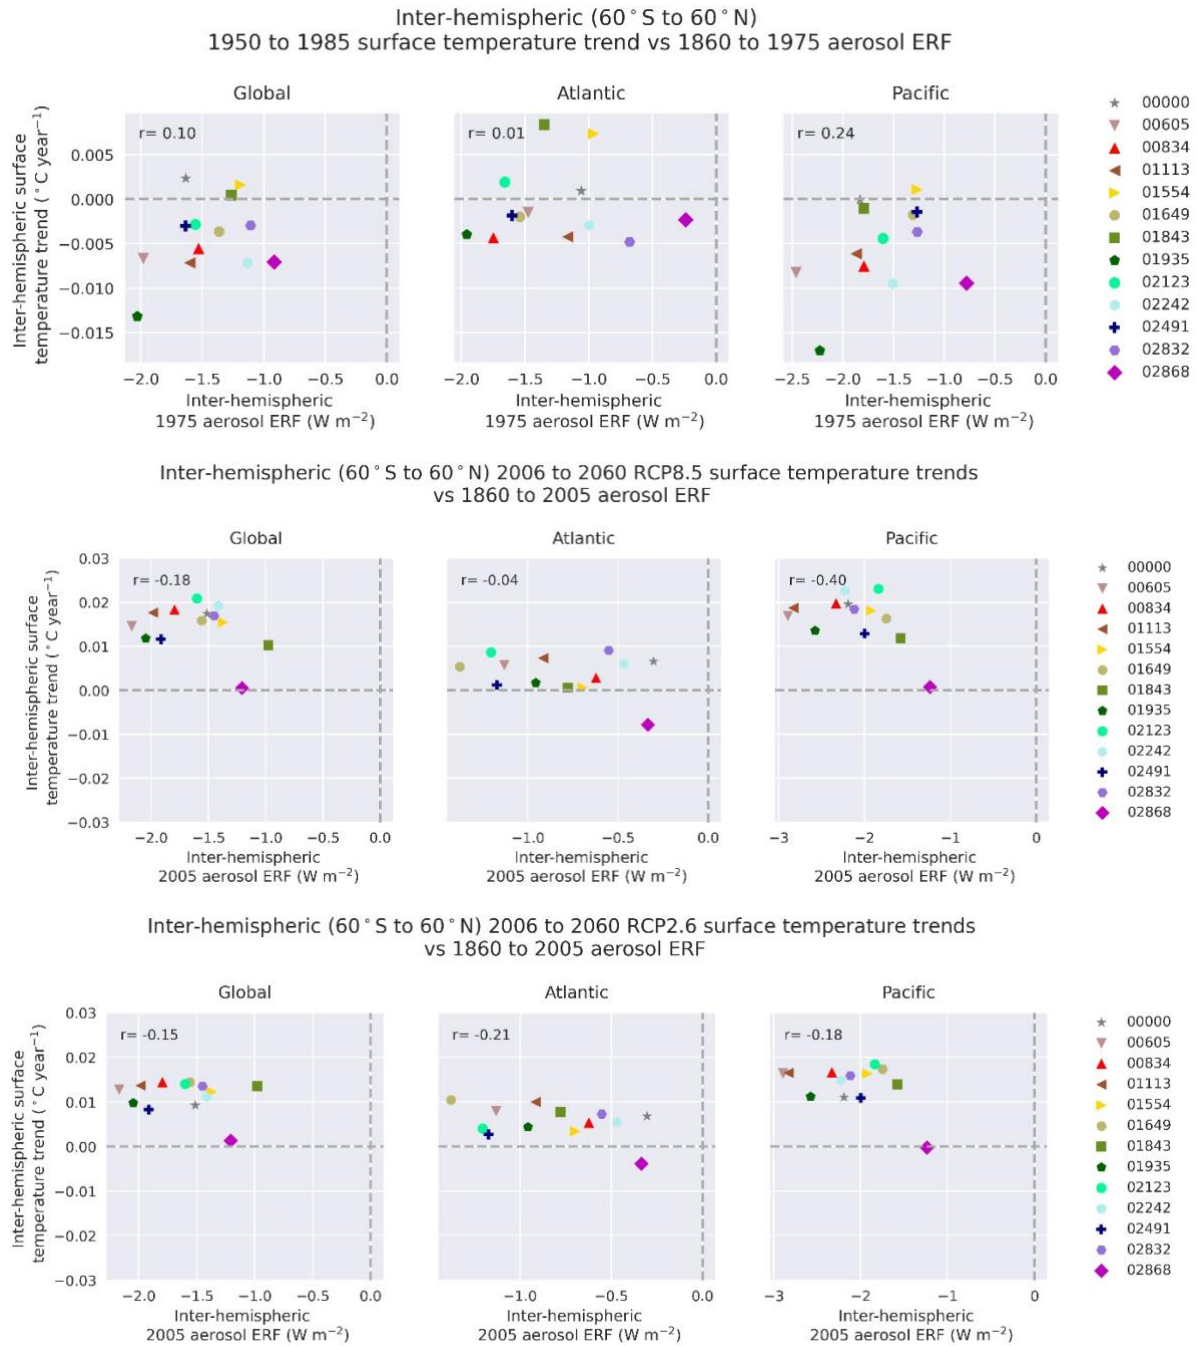



**Figure S9: Scatter plot of the 1950 to 1985 trend in 5-year rolling mean  $\Phi_{ITCZ}$  against inter-hemispheric top of atmosphere outgoing shortwave flux (rsut) (0 to 60 °S and ° N latitude) for global (left), Atlantic (middle) and Pacific (right) regional means. Individual ensemble members are coloured according to legend. Spearman's rank correlation coefficient is shown at top left of each plot.**

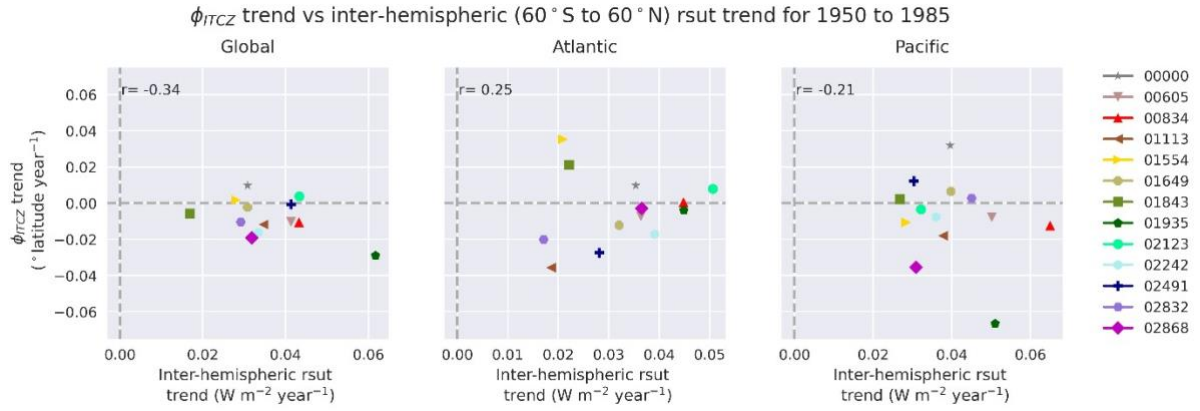

**Figure S10: Scatter plot of the 1950 to 1985 trend in 5-year rolling mean  $\Phi_{ITCZ}$  against inter-hemispheric (0 to 60 °S and ° N latitude) total AOD (top) and dust AOD (bottom) for global (left), Atlantic (middle) and Pacific (right) regional means. Individual ensemble members are coloured according to legend. Spearman's rank correlation coefficient is shown at top left of each plot.**

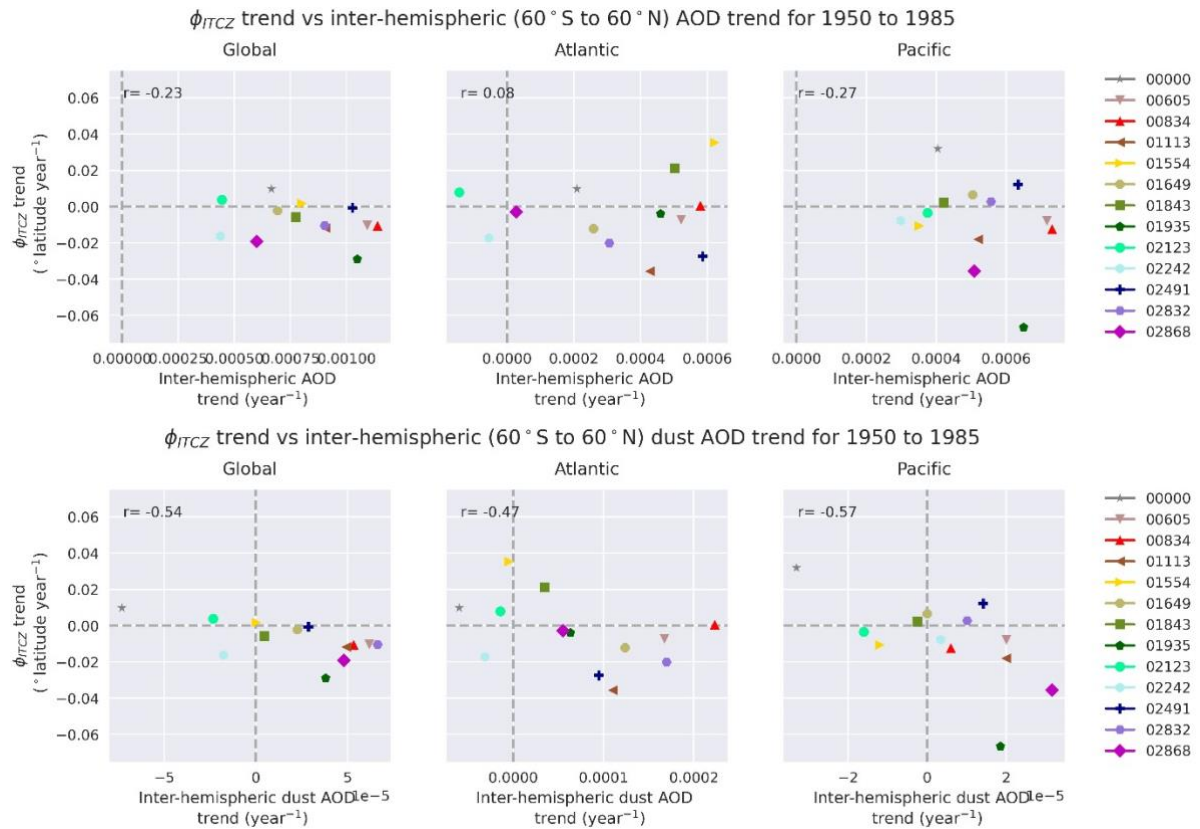

**Figure S11: Scatter plot of 1950 to 1985 and 1940 to 1975 trend in 5-year rolling mean  $\Phi_{ITCZ}$  against trend in global inter-hemispheric (90° S to 90° N) implied forcing from shortwave non-cloud interactions and cloud interactions for global (left), Atlantic (middle) and Pacific (right) regional. Spearman's rank correlation coefficient is shown at top left of each plot.**

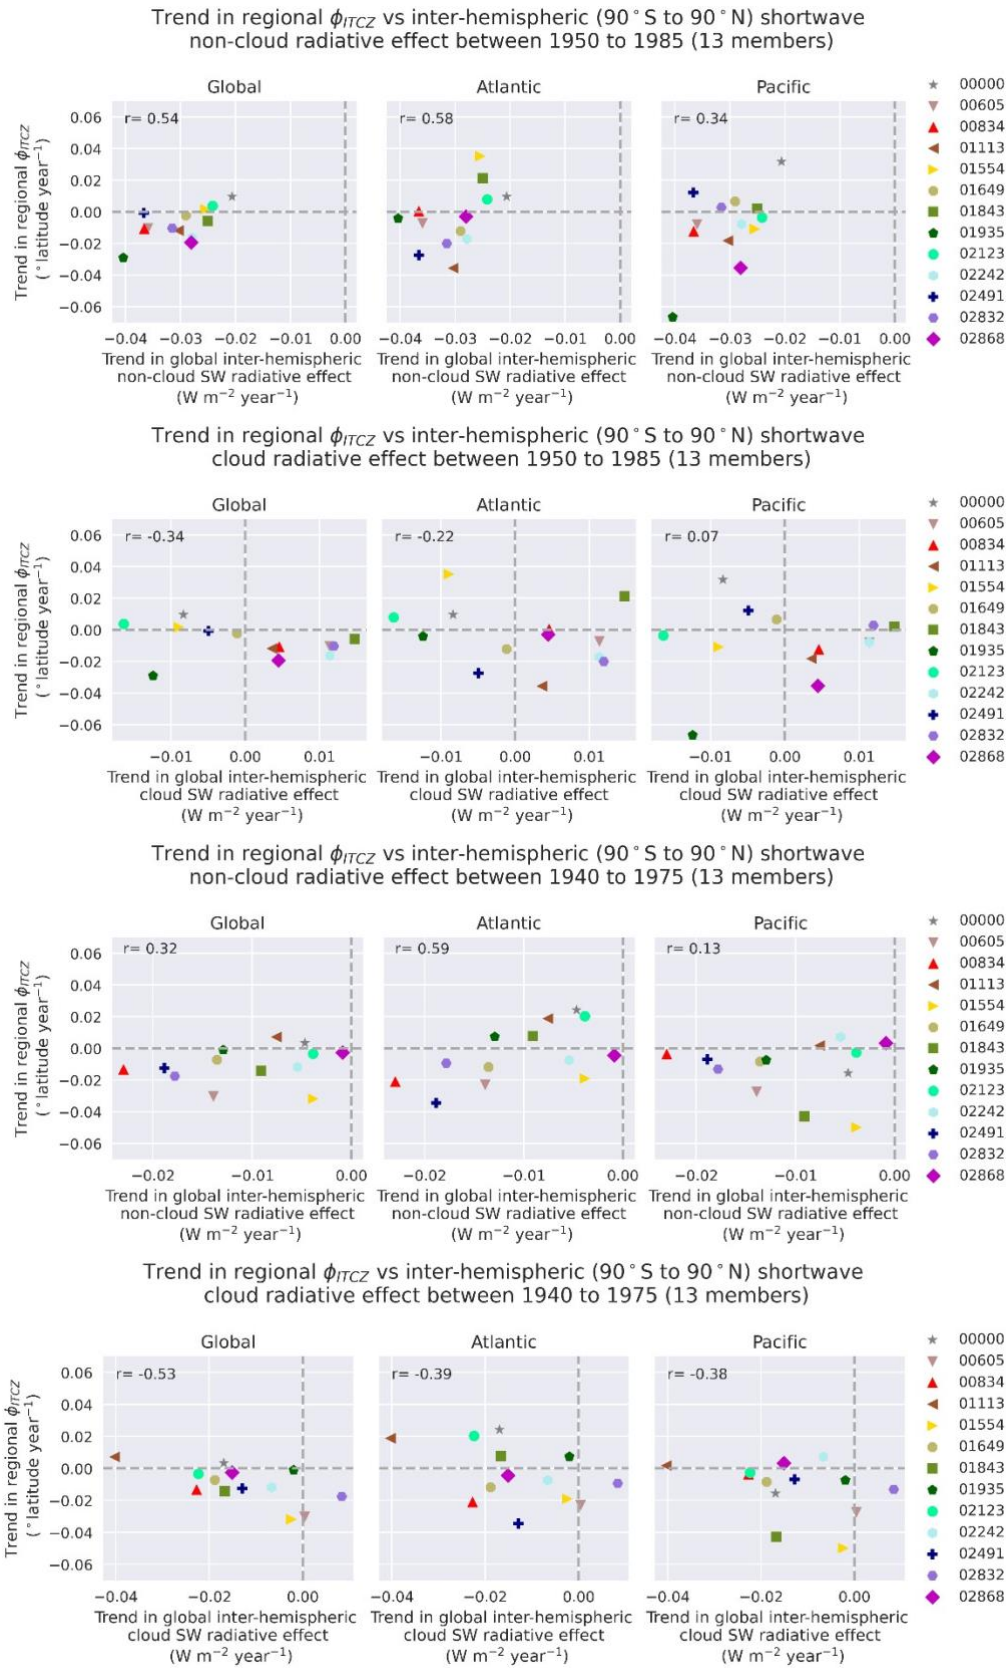

**Figure S12: Plots of the parameters that have a Spearman's rank correlation coefficient or  $r > 0.5$  with the trend in 5year rolling mean  $\phi_{ITCZ}$  in 1950 to 1985 in global (top), Atlantic (middle) and Pacific (bottom) regional means. Individual ensemble members are coloured according to legend. Negative relationships are shown in pink and positive in green. Definitions of parameters are in Table S1.**

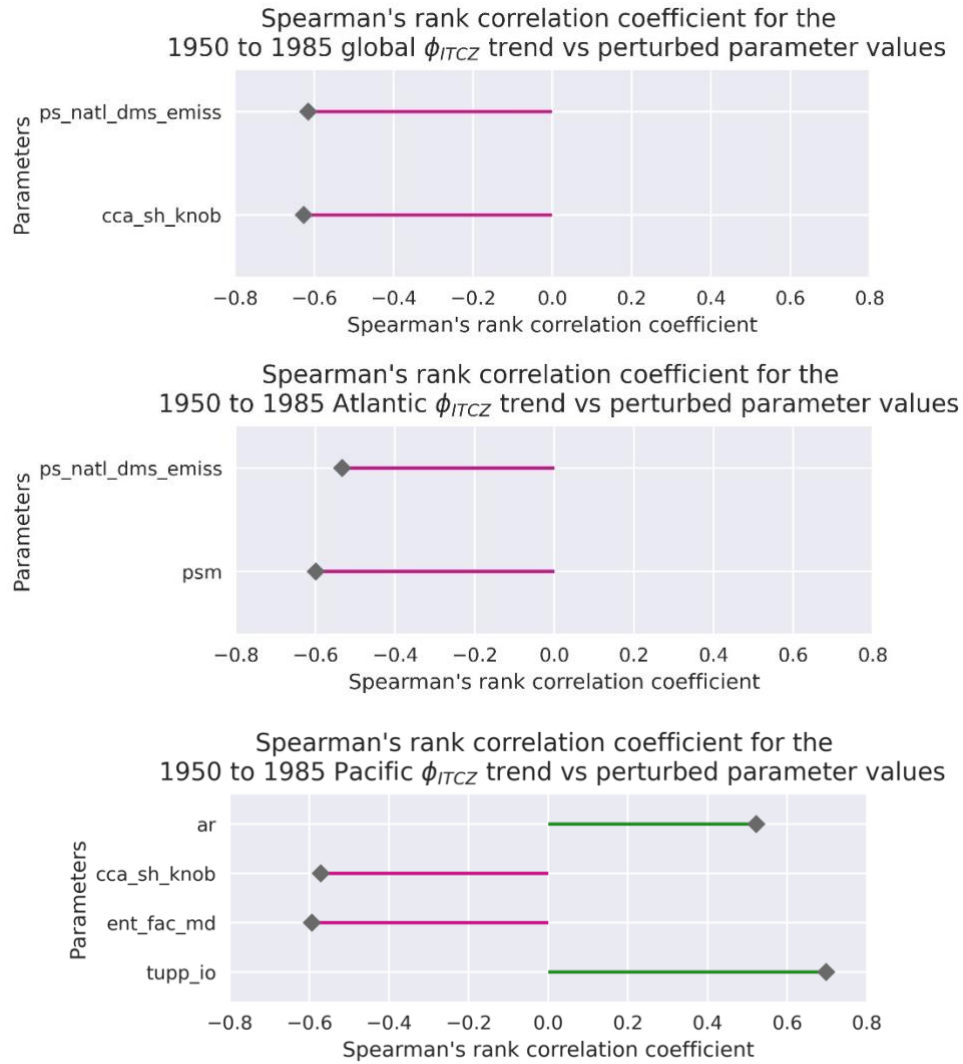

**Figure S13.** Time series of trend in 5-year rolling mean  $\Phi_{ITCZ}$  in 2006 to 2040 for RCP8.5, the internal variability is estimated from HadGEM3-GC3.1 (historical and SSP5-8.5) ensemble. This figure tests how the trend over a future time period of comparable size to the historical time period influences the range of trends in tropical precipitation across the ensemble.

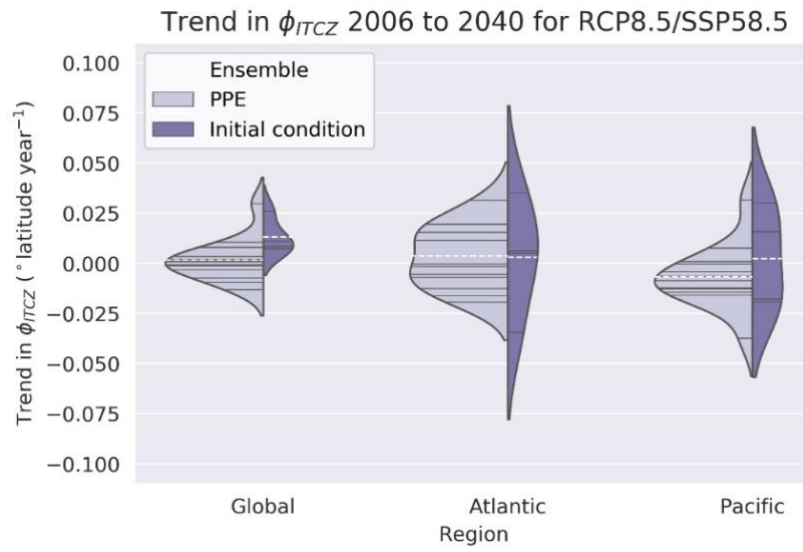

**Figure S14: Scatter plot of trend in 5-year rolling mean  $\Phi_{ITCZ}$  in 2006 to 2060 (top) against ocean-only interhemispheric (60°S to 60°N) trend in surface air temperature (top), implied total forcing (middle) and 1860 to 1975 aerosol ERF (bottom) for global (left), Atlantic (middle) and Pacific (right) regional means. Individual ensemble members are coloured according to legend. The Spearman's rank correlation coefficient is shown at top left of each plot. For the top row, RCP8.5 is red, RCP2.6 is teal, and the scenarios combined is black.**

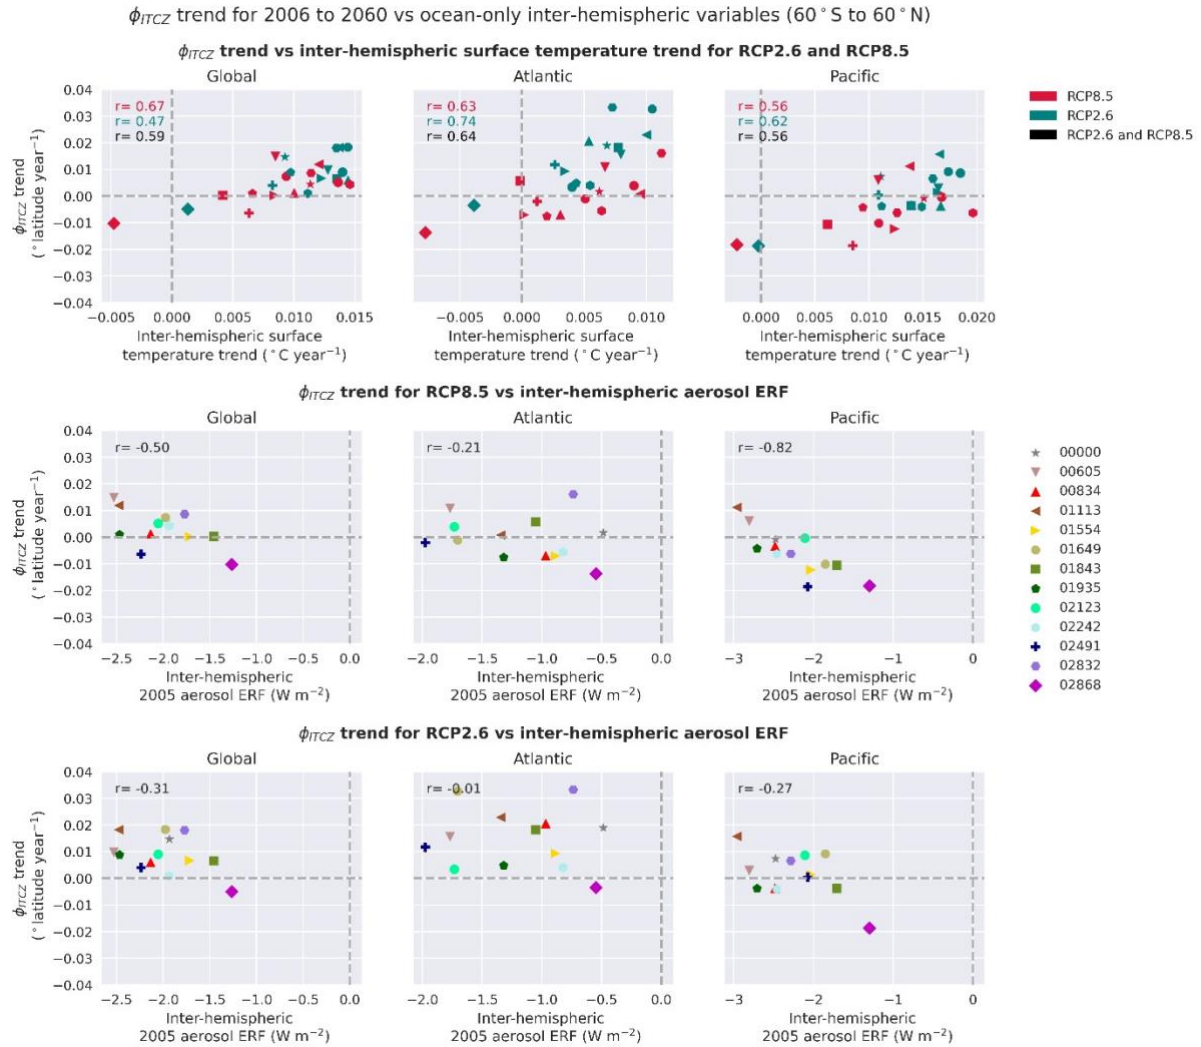



## References

Allen, R. J., Evan, A. T. and Booth, B. B. B.: Interhemispheric aerosol radiative forcing and tropical precipitation shifts during the late Twentieth Century, *J. Clim.*, 28(20), 8219–8246, doi:10.1175/JCLI-D-150148.1, 2015.

Sexton, D. M. H., McSweeney, C. F., Rostron, J. W., Yamazaki, K., Booth, B. B. B., Johnson, J., Murphy, J. M., and Regayre, L.: A perturbed parameter ensemble of HadGEM3-GC3.05 coupled model projections: part 1: selecting the parameter combinations, 2021.
